# Supplementary material for: Silica based click amino stationary phase for ion chromatography and hydrophilic interaction liquid chromatography
Source: Royal Society of Chemistry journal article supplement (doi:10.1039/c2an16277f), 2012-01-01
Supplement: c2an16277f.pdf [file c2an16277f.pdf]

## Electronic Supplementary Information

### Silica based click amino stationary phase for ion chromatography and hydrophilic interaction liquid chromatography

Yajing Liu,<sup>a</sup> Qing Du,<sup>a</sup> Bingcheng Yang,<sup>a</sup> FeiFang Zhang,<sup>a</sup> Changhu Chu,<sup>a</sup> and  
Xinmiao Liang<sup>a,b</sup>

<sup>a</sup> School of Pharmacy, East China University of Science and Technology, Shanghai  
200237, China.

<sup>b</sup> Dalian Institute of chemical Physics, The Chinese Academy of Sciences, Dalian,  
116023, China

**Correspondence:** Dr. Bingcheng Yang, School of Pharmacy, East China University  
of Science and Technology, Shanghai 200237, China

**Email:** bcyang@ecust.edu.cn

**Tel/Fax:** 0086-21-64250622

**SI-Table** Elemental analysis results of the azide-silica and CTASP.

| stationary phase | N%          | C%          | Surface coverage<br>(mmol/g) |
|------------------|-------------|-------------|------------------------------|
| the azide-silica | 1.71        | 4.30        | <u>1.22</u>                  |
| CTASP            | 2.02        | 6.02        | <u>1.44</u>                  |
| <u>ASP</u>       | <u>1.04</u> | <u>4.41</u> | <u>0.74</u>                  |

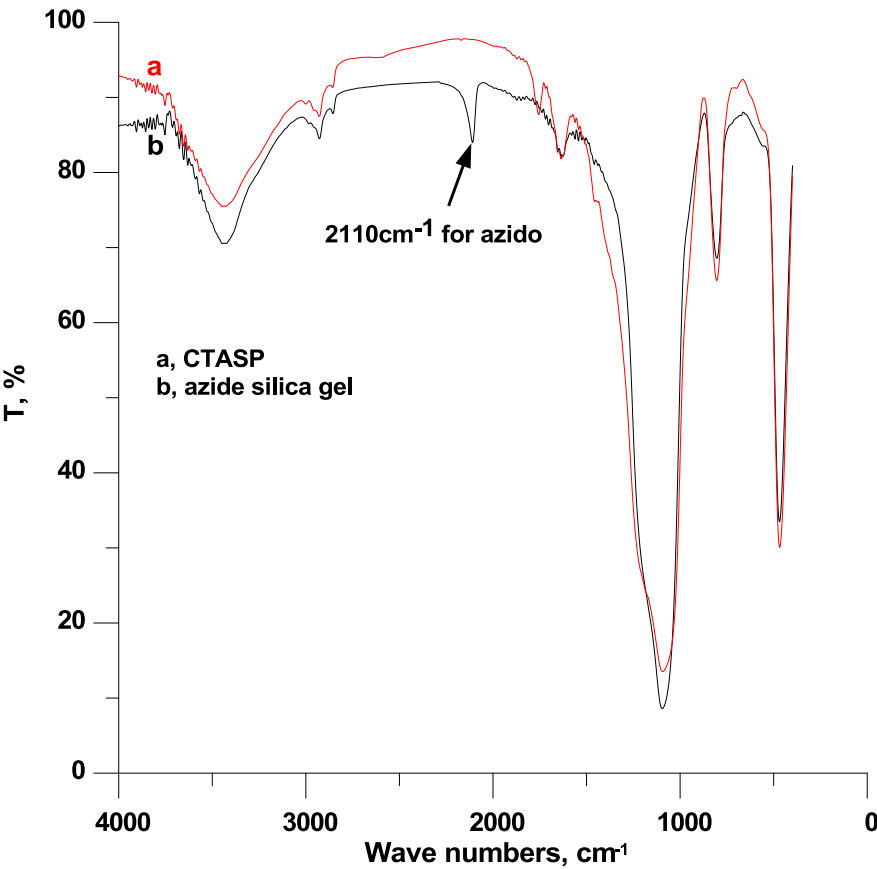

**SI-Fig.1** IR spectral of azide-silica and CTASP

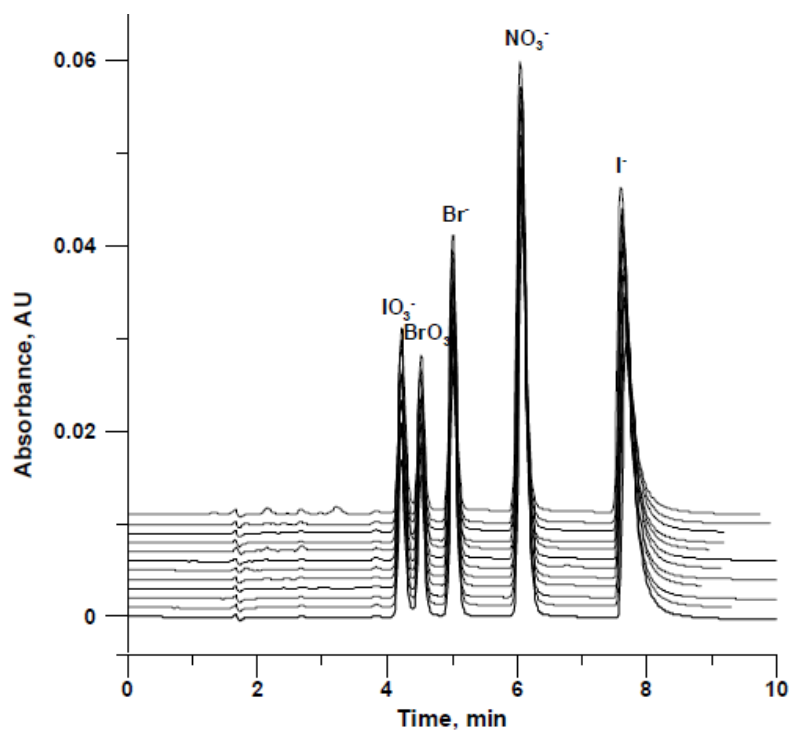

**SI-Fig. 2** Run-to-run reproducibility of the CTASP-based column

Conditions same to Fig. 2.

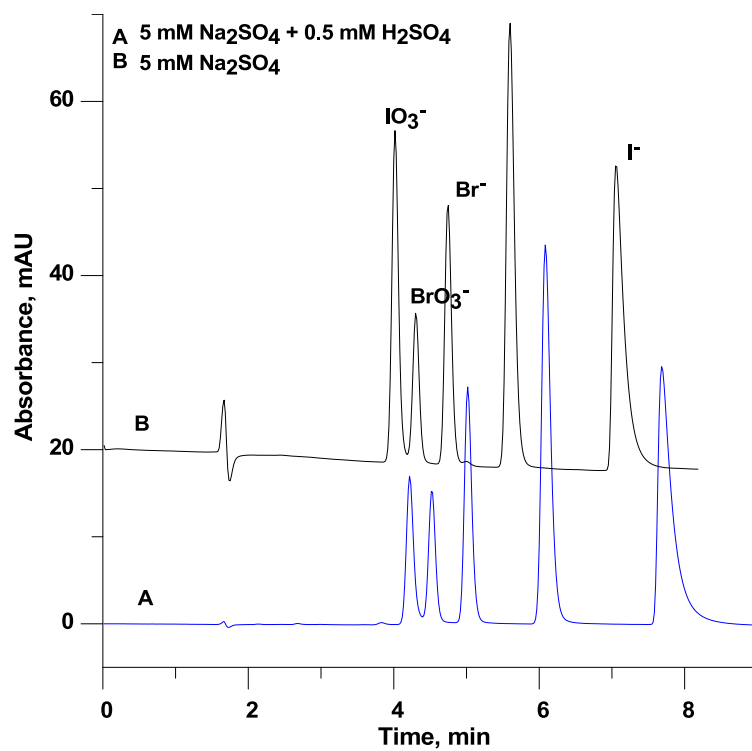

**SI-Fig. 3** Effect of pH value of the eluent on the retention. Conditions same to Fig. 2.

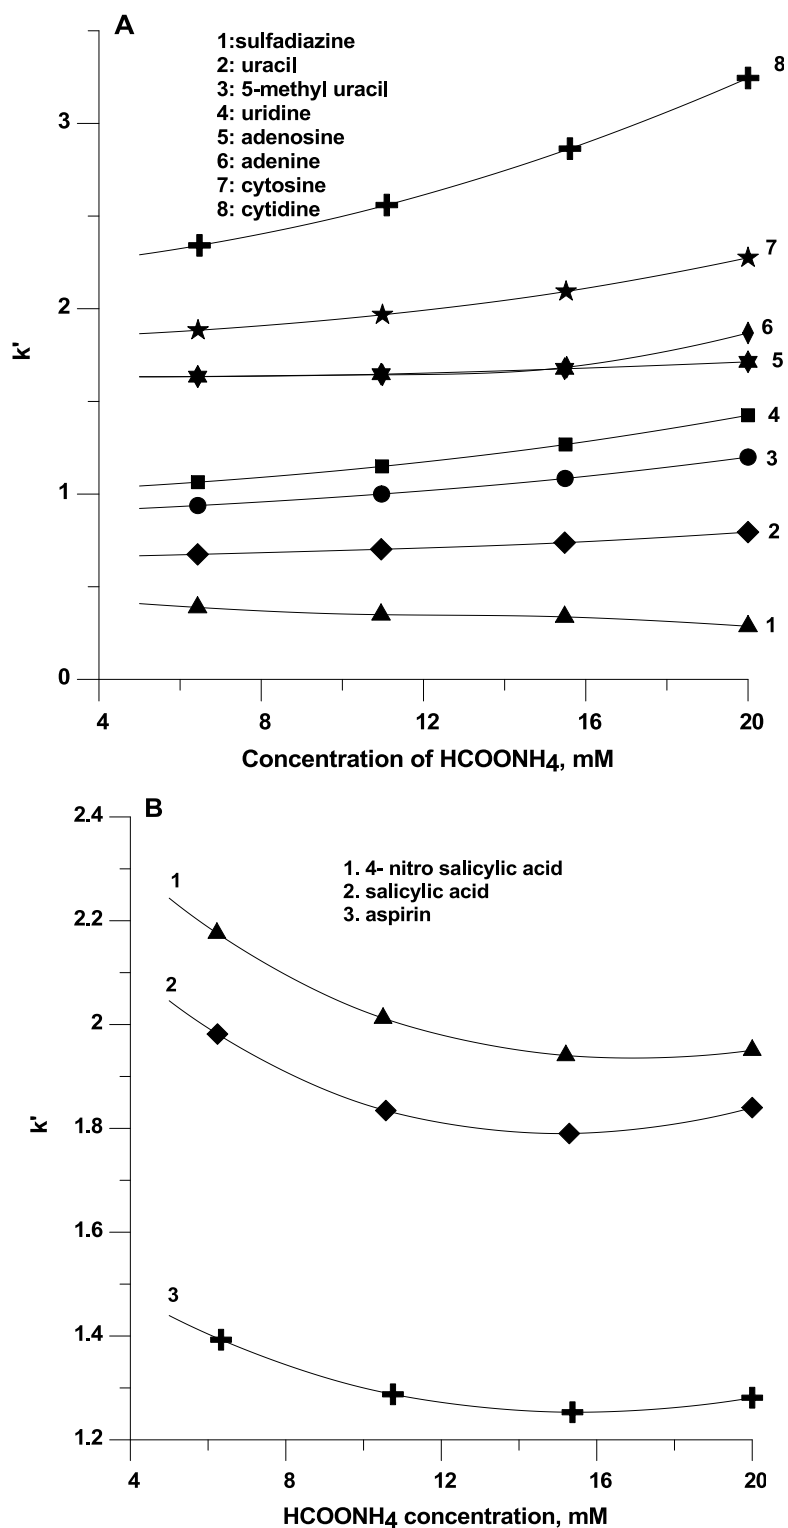

**SI-Fig.4** Effect of salt concentration added in the mobile phase on the retention of analytes Conditions: A, nucleosides; B, small molecule acids. Other conditions same to Fig. 3.

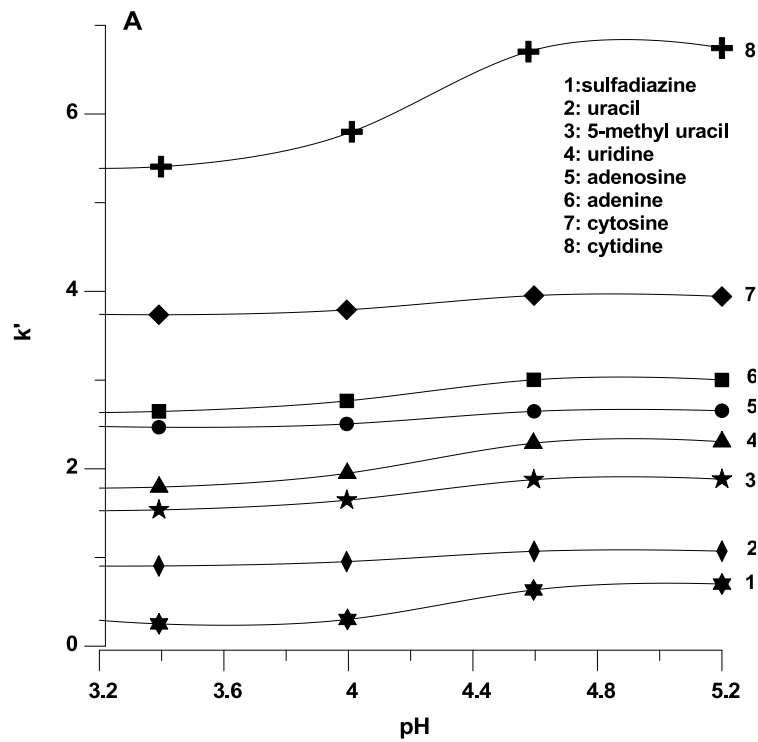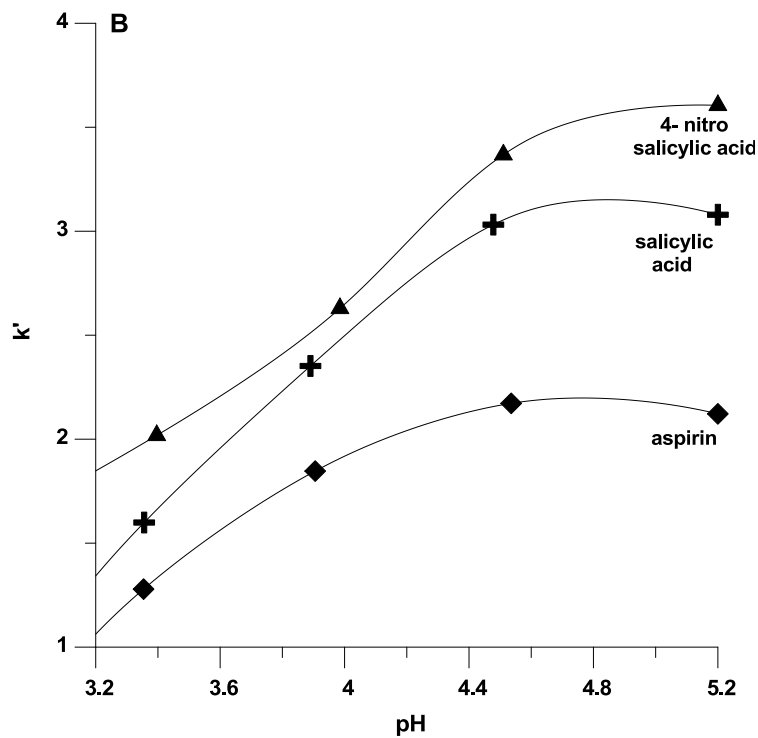

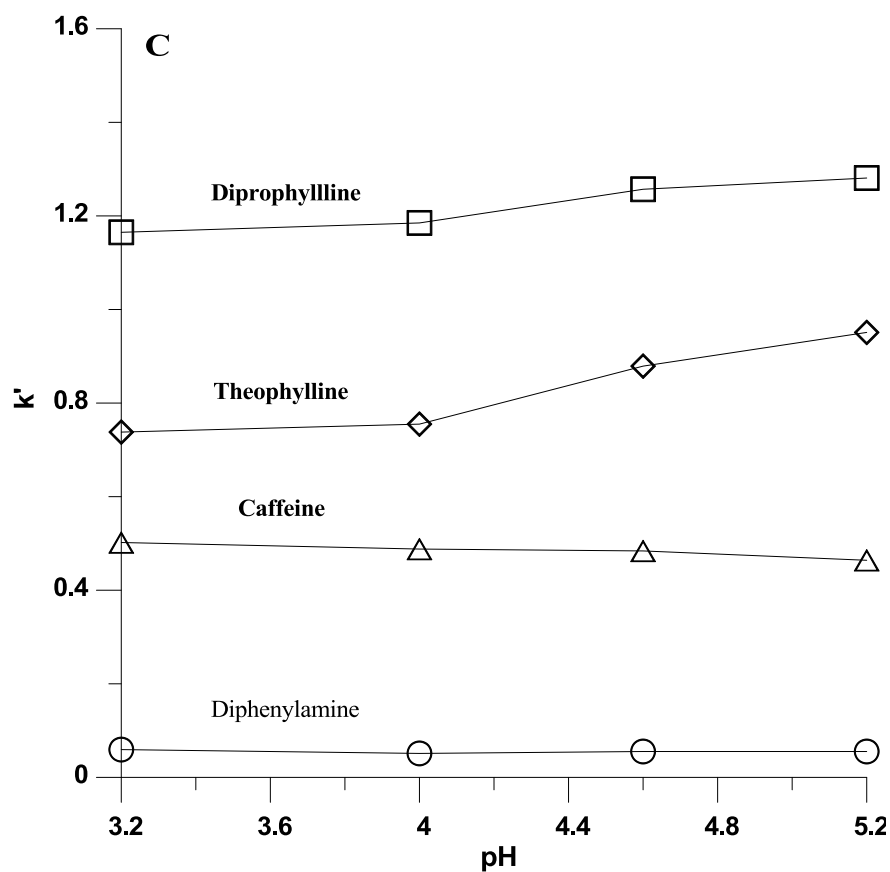

**SI-Fig.5** Effect of pH value of the mobile phase on the retention of analytes

Conditions: a, nucleosides; b, organic acids; c, organic bases. Other conditions same to Fig. 3.
